# Supplementary material for: Implications of disease-modifying therapies for multiple sclerosis on immune cells and response to COVID-19 vaccination
Source: Front Immunol. 2024 Jul 15;15:1416464. doi: 10.3389/fimmu.2024.1416464 (PMC11284103; doi:10.3389/fimmu.2024.1416464)
Supplement: Supplementary file 7 [file Table_6.xlsx]

## Sheet: FTYvsCT_BvsB
Supplementary Table 6. Cell surface activation markers at basal level in MS patients vs CT. For comparisons of activation markers among groups, the significance threshold was 2.98x10-4 corresponding to the nominal P-value of 0.05 divided by 12 traits simultaneously assessed and 14 comparisons considered (7 at basal level and 7 after stimulation). P-values lower than the significant threshold are …
Trait	Group1	Group2	T3.p_value_wilcoxon	T3.Sample_size1	T3.Mean_Group1	T3.Median_Group1	T3.Sample_size2	T3.Mean_Group2	T3.Median_Group2	T0.p_value_wilcoxon	T0.Sample_size1	T0.Mean_Group1	T0.Median_Group1	T0.Sample_size2	T0.Mean_Group2	T0.Median_Group2	T1.p_value_wilcoxon	T1.Sample_size1	T1.Mean_Group1	T1.Median_Group1	T1.Sample_size2	T1.Mean_Group2	T1.Median_Group2	T2.p_value_wilcoxon	T2.Sample_size1	T2.Mean_Group1	T2.Median_Group1	T2.Sample_size2	T2.Mean_Group2	T2.Median_Group2
HLA-DR+ CD4% CD4 T cells	FTY	CT	1.54412e-06	16	4.13305	3.42535	28	1.10776	1.09905	0.0003108	8	3.65711	3.2093	7	1.05911	1.0139	0.000113997	12	3.41708	3.0945	25	1.18286	0.945	0.00119076	12	4.47947	4.08165	7	1.0083	0.9579
CD69+ B% B cells	FTY	CT	3.01601e-06	16	48.1342	50.8916	28	28.5535	28.0215	0.0540793	8	51.5613	45.95	7	37.2967	34.7136	2.12137e-05	12	51.8882	51.2282	25	30.6683	27.4039	0.00373105	12	46.4194	42.5074	7	29.2772	31.3248
CD69+ CD8% CD8 T cells	FTY	CT	0.000101776	16	27.1668	24.9698	28	11.8054	8.4511	0.0400932	8	40.498	38.3152	7	19.6476	14.8966	7.23353e-08	12	39.0815	40.4648	25	11.6785	9.2584	0.0556482	12	33.7783	32.8782	7	18.8783	12.2785
CD137+ B% B cells	FTY	CT	0.000323838	16	3.39913	3.2312	28	1.43883	1.3847	0.189277	8	2.39942	1.9835	7	1.32239	1.4675	0.0413846	12	2.32923	2.10255	25	1.29889	1.3283	0.299119	12	3.13624	2.8265	7	2.18749	1.7245
HLA-DR+ B% B cells	FTY	CT	0.024413	16	81.6704	80.9169	28	87.6085	90.1245	0.189277	8	93.7047	96.4531	7	91.7932	92.3993	0.267179	12	81.2999	87.4159	25	87.3716	88.6859	0.34024	12	79.6029	89.6856	7	91.4436	92.3137
CD137+ CD4% CD4 T cells	FTY	CT	0.0650499	16	0.646144	0.5915	28	0.391436	0.326	0.778866	8	0.77225	0.6163	7	0.593257	0.4748	0.910901	12	0.450383	0.26465	25	0.393264	0.3477	0.901802	12	0.4737	0.2858	7	0.376786	0.2891
CD69+ CD4% CD4 T cells	FTY	CT	0.0999795	16	9.56261	8.02175	28	6.19646	5.836	0.866511	8	13.3087	12.1687	7	14.8039	14.3636	2.12137e-05	12	18.5165	17.0084	25	6.49116	5.0998	0.0683496	12	11.282	8.53285	7	5.48709	3.3236
HLA-DR+ CD8% CD8 T cells	FTY	CT	0.303401	16	4.03014	3.05645	28	3.58545	2.5712	0.0400932	8	6.2319	5.8776	7	2.8678	2.4394	0.553548	12	3.54404	2.9582	25	3.71182	2.5267	0.0221084	12	6.16436	5.8015	7	2.62091	1.9151
CD25+ CD4% CD4 T cells	FTY	CT	0.364263	16	5.94454	6.04335	28	5.15187	4.60145	0.53582	8	7.53665	6.96885	7	5.60393	4.093	1	12	5.08913	5.88155	25	5.34083	4.4373	0.0683496	12	6.98538	7.8184	7	4.06094	4.105
CD137+ CD8% CD8 T cells	FTY	CT	0.475929	16	1.65512	0.3335	28	0.718436	0.2103	0.694328	8	1.50046	0.9864	7	0.739314	0.4719	0.36027	12	0.746658	0.52995	25	0.855896	0.3068	0.482416	12	0.394267	0.3478	7	1.2113	0.3356
CD25+ B% B cells	FTY	CT	0.491068	16	10.3318	8.2424	28	11.0483	8.8717	0.866511	8	6.85832	6.86115	7	5.92216	5.5152	0.109036	12	7.44969	5.9275	25	11.1017	8.3929	0.34024	12	6.55819	4.86195	7	8.00034	7.7589
CD25+ CD8% CD8 T cells	FTY	CT	0.708379	16	1.28309	1.012	28	1.20183	0.53515	0.120591	8	2.32581	1.91085	7	0.9611	0.4992	0.413425	12	1.61184	1.17445	25	1.11774	0.6771	0.142216	12	1.15733	0.84685	7	0.783129	0.3299

## Sheet: DMFvsCT_BvsB
Trait	Group1	Group2	T3.p_value_wilcoxon	T3.Sample_size1	T3.Mean_Group1	T3.Median_Group1	T3.Sample_size2	T3.Mean_Group2	T3.Median_Group2	T0.p_value_wilcoxon	T0.Sample_size1	T0.Mean_Group1	T0.Median_Group1	T0.Sample_size2	T0.Mean_Group2	T0.Median_Group2	T1.p_value_wilcoxon	T1.Sample_size1	T1.Mean_Group1	T1.Median_Group1	T1.Sample_size2	T1.Mean_Group2	T1.Median_Group2	T2.p_value_wilcoxon	T2.Sample_size1	T2.Mean_Group1	T2.Median_Group1	T2.Sample_size2	T2.Mean_Group2	T2.Median_Group2
CD69+ B% B cells	DMF	CT	4.73484e-09	22	55.3263	51.3663	28	28.5535	28.0215	0.0144737	13	51.9818	47.1729	7	37.2967	34.7136	2.20408e-07	15	55.1887	51.3716	25	30.6683	27.4039	0.00178614	12	49.0232	49.318	7	29.2772	31.3248
CD69+ CD4% CD4 T cells	DMF	CT	6.84026e-09	22	26.3025	25.5987	28	6.19646	5.836	0.055676	13	31.4924	25.4162	7	14.8039	14.3636	9.69538e-09	15	26.6101	24.3182	25	6.49116	5.0998	0.00178614	12	22.637	20.6835	7	5.48709	3.3236
CD69+ CD8% CD8 T cells	DMF	CT	1.31391e-07	22	40.0738	42.1962	28	11.8054	8.4511	0.0296956	13	41.5678	39.0625	7	19.6476	14.8966	7.90546e-08	15	41.3959	36.3588	25	11.6785	9.2584	0.0556482	12	35.7216	31.5104	7	18.8783	12.2785
CD137+ CD8% CD8 T cells	DMF	CT	0.000973499	22	2.80455	1.57025	28	0.718436	0.2103	0.15743	13	4.07133	1.1827	7	0.739314	0.4719	0.00351325	15	2.89167	1.7241	25	0.855896	0.3068	0.22684	12	2.46573	1.6709	7	1.2113	0.3356
CD25+ CD8% CD8 T cells	DMF	CT	0.00823041	22	3.2379	2.66835	28	1.20183	0.53515	0.0144737	13	3.17129	3.0097	7	0.9611	0.4992	0.000688077	15	3.69855	3.002	25	1.11774	0.6771	0.00373105	12	3.13404	2.63765	7	0.783129	0.3299
CD137+ CD4% CD4 T cells	DMF	CT	0.0348016	22	0.690795	0.43855	28	0.391436	0.326	0.699174	13	0.567408	0.2981	7	0.593257	0.4748	0.0149799	15	0.73786	0.5203	25	0.393264	0.3477	0.591808	12	0.484883	0.45725	7	0.376786	0.2891
CD137+ B% B cells	DMF	CT	0.409568	22	1.32222	1.21175	28	1.43883	1.3847	0.757301	13	1.9844	1.3138	7	1.32239	1.4675	0.243884	15	2.07371	1.4027	25	1.29889	1.3283	0.100262	12	1.36763	0.78085	7	2.18749	1.7245
CD25+ CD4% CD4 T cells	DMF	CT	0.420721	22	6.62433	5.5675	28	5.15187	4.60145	0.588029	13	5.04732	3.546	7	5.60393	4.093	0.132596	15	7.0616	7.6925	25	5.34083	4.4373	0.535842	12	5.45142	5.2211	7	4.06094	4.105
CD25+ B% B cells	DMF	CT	0.662892	22	11.2484	8.84405	28	11.0483	8.8717	0.241357	13	12.1173	8.0813	7	5.92216	5.5152	0.525004	15	13.5698	9.656	25	11.1017	8.3929	1	12	9.38702	8.2581	7	8.00034	7.7589
HLA-DR+ CD4% CD4 T cells	DMF	CT	0.930563	22	1.1626	0.9462	28	1.10776	1.09905	0.210604	13	0.940685	0.8011	7	1.05911	1.0139	0.846827	15	1.31611	1.0081	25	1.18286	0.945	0.650353	12	1.25762	1.1003	7	1.0083	0.9579
HLA-DR+ B% B cells	DMF	CT	0.930563	22	87.3717	88.9517	28	87.6085	90.1245	1	13	91.6946	92.1026	7	91.7932	92.3993	0.580595	15	88.7993	91.2942	25	87.3716	88.6859	0.591808	12	89.6147	91.2738	7	91.4436	92.3137
HLA-DR+ CD8% CD8 T cells	DMF	CT	0.976829	22	3.58062	2.8988	28	3.58545	2.5712	0.699174	13	2.8881	2.7079	7	2.8678	2.4394	0.825269	15	3.75815	2.5561	25	3.71182	2.5267	0.083115	12	5.21653	3.7294	7	2.62091	1.9151

## Sheet: NATvsCT_BvsB
Trait	Group1	Group2	T3.p_value_wilcoxon	T3.Sample_size1	T3.Mean_Group1	T3.Median_Group1	T3.Sample_size2	T3.Mean_Group2	T3.Median_Group2	T0.p_value_wilcoxon	T0.Sample_size1	T0.Mean_Group1	T0.Median_Group1	T0.Sample_size2	T0.Mean_Group2	T0.Median_Group2	T1.p_value_wilcoxon	T1.Sample_size1	T1.Mean_Group1	T1.Median_Group1	T1.Sample_size2	T1.Mean_Group2	T1.Median_Group2	T2.p_value_wilcoxon	T2.Sample_size1	T2.Mean_Group1	T2.Median_Group1	T2.Sample_size2	T2.Mean_Group2	T2.Median_Group2
CD25+ B% B cells	NAT	CT	1.18854e-07	20	27.335	26.9681	28	11.0483	8.8717	8.20903e-05	15	23.286	25.65	7	5.92216	5.5152	0.000354444	12	22.7287	22.6064	25	11.1017	8.3929	1.66424e-05	18	26.3565	25.8924	7	8.00034	7.7589
CD69+ B% B cells	NAT	CT	3.10237e-07	20	53.5535	50.5333	28	28.5535	28.0215	0.490208	15	41.6051	42.3588	7	37.2967	34.7136	0.101883	12	36.5123	33.4858	25	30.6683	27.4039	0.0115873	18	39.978	39.9098	7	29.2772	31.3248
HLA-DR+ CD4% CD4 T cells	NAT	CT	0.000583924	20	1.70155	1.62385	28	1.10776	1.09905	0.210069	15	1.35082	1.3414	7	1.05911	1.0139	0.0115636	12	1.66803	1.4072	25	1.18286	0.945	0.00302892	18	1.65641	1.52605	7	1.0083	0.9579
CD69+ CD4% CD4 T cells	NAT	CT	0.000822606	20	14.6643	15.0433	28	6.19646	5.836	0.581492	15	11.9881	10.271	7	14.8039	14.3636	0.0614543	12	10.8775	8.7393	25	6.49116	5.0998	0.177508	18	7.14411	7.8585	7	5.48709	3.3236
CD25+ CD4% CD4 T cells	NAT	CT	0.00114642	20	8.39029	7.34395	28	5.15187	4.60145	0.162363	15	8.34536	7.0918	7	5.60393	4.093	0.0413846	12	8.13651	6.8883	25	5.34083	4.4373	0.0038652	18	8.10444	6.53635	7	4.06094	4.105
HLA-DR+ B% B cells	NAT	CT	0.00338099	20	92.5667	93.6174	28	87.6085	90.1245	0.141653	15	94.3183	95.0039	7	91.7932	92.3993	0.160278	12	91.4337	91.4222	25	87.3716	88.6859	0.745088	18	91.8717	92.4771	7	91.4436	92.3137
CD25+ CD8% CD8 T cells	NAT	CT	0.00947854	20	2.15104	1.8466	28	1.20183	0.53515	0.077716	15	1.90056	1.6508	7	0.9611	0.4992	0.28146	12	1.45881	1.2836	25	1.11774	0.6771	0.0205326	18	1.92617	1.4393	7	0.783129	0.3299
CD137+ CD4% CD4 T cells	NAT	CT	0.0385744	20	0.615125	0.47115	28	0.391436	0.326	0.210069	15	0.3501	0.3503	7	0.593257	0.4748	0.987246	12	0.413867	0.36255	25	0.393264	0.3477	0.929395	18	0.415883	0.32735	7	0.376786	0.2891
CD137+ B% B cells	NAT	CT	0.293968	20	2.01399	1.59595	28	1.43883	1.3847	0.836593	15	1.61461	1.0893	7	1.32239	1.4675	0.597347	12	1.70187	1.25135	25	1.29889	1.3283	0.495398	18	1.87821	1.6628	7	2.18749	1.7245
CD69+ CD8% CD8 T cells	NAT	CT	0.303702	20	14.5392	13.3366	28	11.8054	8.4511	0.185137	15	14.027	8.7694	7	19.6476	14.8966	1	12	13.265	8.91275	25	11.6785	9.2584	0.244306	18	8.65433	5.57675	7	18.8783	12.2785
CD137+ CD8% CD8 T cells	NAT	CT	0.400597	20	0.503405	0.3843	28	0.718436	0.2103	0.490208	15	0.590193	0.2618	7	0.739314	0.4719	0.395226	12	0.389892	0.3012	25	0.855896	0.3068	0.297129	18	0.373789	0.27715	7	1.2113	0.3356
HLA-DR+ CD8% CD8 T cells	NAT	CT	0.958714	20	2.86313	2.56075	28	3.58545	2.5712	0.447474	15	2.44837	2.1647	7	2.8678	2.4394	0.642612	12	2.80541	2.7477	25	3.71182	2.5267	0.297129	18	3.37881	3.34225	7	2.62091	1.9151

## Sheet: UNTRvsCT_BvsB
Trait	Group1	Group2	T3.p_value_wilcoxon	T3.Sample_size1	T3.Mean_Group1	T3.Median_Group1	T3.Sample_size2	T3.Mean_Group2	T3.Median_Group2	T0.p_value_wilcoxon	T0.Sample_size1	T0.Mean_Group1	T0.Median_Group1	T0.Sample_size2	T0.Mean_Group2	T0.Median_Group2	T1.p_value_wilcoxon	T1.Sample_size1	T1.Mean_Group1	T1.Median_Group1	T1.Sample_size2	T1.Mean_Group2	T1.Median_Group2	T2.p_value_wilcoxon	T2.Sample_size1	T2.Mean_Group1	T2.Median_Group1	T2.Sample_size2	T2.Mean_Group2	T2.Median_Group2
CD69+ CD8% CD8 T cells	UNTR	CT	0.00173656	12	18.9507	17.7276	28	11.8054	8.4511	0.208625	7	28.4128	29.256	7	19.6476	14.8966	0.00473808	9	20.7908	17.3297	25	11.6785	9.2584	0.516667	3	27.3352	28.7823	7	18.8783	12.2785
CD69+ B% B cells	UNTR	CT	0.0101946	12	41.5934	39.5099	28	28.5535	28.0215	0.0174825	7	56.776	49.4662	7	37.2967	34.7136	0.0658921	9	43.9772	43.6253	25	30.6683	27.4039	1	3	32.0843	29.7083	7	29.2772	31.3248
CD137+ CD4% CD4 T cells	UNTR	CT	0.0159895	12	0.625625	0.63715	28	0.391436	0.326	0.620047	7	0.617543	0.7609	7	0.593257	0.4748	0.33539	9	0.484011	0.3856	25	0.393264	0.3477	0.116667	3	0.831067	0.7913	7	0.376786	0.2891
CD69+ CD4% CD4 T cells	UNTR	CT	0.0390218	12	11.6509	12.5376	28	6.19646	5.836	0.534965	7	19.8258	22.0044	7	14.8039	14.3636	0.0600913	9	10.3804	8.9904	25	6.49116	5.0998	0.183333	3	10.5304	12.0976	7	5.48709	3.3236
CD25+ CD4% CD4 T cells	UNTR	CT	0.0523282	12	6.85722	7.2194	28	5.15187	4.60145	0.620047	7	5.80256	4.8646	7	5.60393	4.093	0.908482	9	4.97793	4.5877	25	5.34083	4.4373	0.516667	3	4.9957	5.1265	7	4.06094	4.105
CD137+ CD8% CD8 T cells	UNTR	CT	0.0645471	12	1.86793	0.5523	28	0.718436	0.2103	0.0378788	7	1.9523	1.0803	7	0.739314	0.4719	0.0408207	9	1.16633	0.7445	25	0.855896	0.3068	0.116667	3	3.94157	2.952	7	1.2113	0.3356
CD25+ CD8% CD8 T cells	UNTR	CT	0.0789483	12	1.97113	1.6263	28	1.20183	0.53515	0.128205	7	2.16093	1.456	7	0.9611	0.4992	0.0332675	9	2.05066	1.8637	25	1.11774	0.6771	0.0166667	3	3.7339	3.8745	7	0.783129	0.3299
CD137+ B% B cells	UNTR	CT	0.163085	12	2.46826	1.9062	28	1.43883	1.3847	0.382867	7	1.88587	1.6297	7	1.32239	1.4675	0.441858	9	1.53518	1.4482	25	1.29889	1.3283	0.833333	3	1.7647	1.5262	7	2.18749	1.7245
CD25+ B% B cells	UNTR	CT	0.313188	12	12.3404	12.1918	28	11.0483	8.8717	0.0110723	7	11.8197	10.8955	7	5.92216	5.5152	0.419197	9	12.1116	14.0621	25	11.1017	8.3929	0.833333	3	8.7253	8.3782	7	8.00034	7.7589
HLA-DR+ CD4% CD4 T cells	UNTR	CT	0.405483	12	1.5558	1.15515	28	1.10776	1.09905	0.620047	7	1.18196	1.0873	7	1.05911	1.0139	0.759078	9	1.16187	1.1142	25	1.18286	0.945	0.516667	3	1.69003	1.2956	7	1.0083	0.9579
HLA-DR+ CD8% CD8 T cells	UNTR	CT	0.651718	12	3.34711	2.7983	28	3.58545	2.5712	0.804779	7	3.52346	3.0111	7	2.8678	2.4394	0.759078	9	3.28144	2.9412	25	3.71182	2.5267	0.516667	3	4.2641	5.3317	7	2.62091	1.9151
HLA-DR+ B% B cells	UNTR	CT	0.7599	12	85.5557	90.8541	28	87.6085	90.1245	0.317599	7	94.0999	94.2817	7	91.7932	92.3993	1	9	86.2831	87.6626	25	87.3716	88.6859	0.516667	3	88.1382	90.7703	7	91.4436	92.3137

## Sheet: FTYvsUNTR_BvsB
Trait	Group1	Group2	T3.p_value_wilcoxon	T3.Sample_size1	T3.Mean_Group1	T3.Median_Group1	T3.Sample_size2	T3.Mean_Group2	T3.Median_Group2	T0.p_value_wilcoxon	T0.Sample_size1	T0.Mean_Group1	T0.Median_Group1	T0.Sample_size2	T0.Mean_Group2	T0.Median_Group2	T1.p_value_wilcoxon	T1.Sample_size1	T1.Mean_Group1	T1.Median_Group1	T1.Sample_size2	T1.Mean_Group2	T1.Median_Group2	T2.p_value_wilcoxon	T2.Sample_size1	T2.Mean_Group1	T2.Median_Group1	T2.Sample_size2	T2.Mean_Group2	T2.Median_Group2
HLA-DR+ CD4% CD4 T cells	FTY	UNTR	0.00149926	16	4.13305	3.42535	12	1.5558	1.15515	0.0012432	8	3.65711	3.2093	7	1.18196	1.0873	0.00725343	12	3.41708	3.0945	9	1.16187	1.1142	0.101099	12	4.47947	4.08165	3	1.69003	1.2956
CD137+ B% B cells	FTY	UNTR	0.121161	16	3.39913	3.2312	12	2.46826	1.9062	0.694328	8	2.39942	1.9835	7	1.88587	1.6297	0.463913	12	2.32923	2.10255	9	1.53518	1.4482	0.294505	12	3.13624	2.8265	3	1.7647	1.5262
HLA-DR+ B% B cells	FTY	UNTR	0.121161	16	81.6704	80.9169	12	85.5557	90.8541	0.694328	8	93.7047	96.4531	7	94.0999	94.2817	0.422107	12	81.2999	87.4159	9	86.2831	87.6626	0.945055	12	79.6029	89.6856	3	88.1382	90.7703
CD69+ CD4% CD4 T cells	FTY	UNTR	0.13299	16	9.56261	8.02175	12	11.6509	12.5376	0.231857	8	13.3087	12.1687	7	19.8258	22.0044	0.0490729	12	18.5165	17.0084	9	10.3804	8.9904	0.632967	12	11.282	8.53285	3	10.5304	12.0976
CD69+ B% B cells	FTY	UNTR	0.173646	16	48.1342	50.8916	12	41.5934	39.5099	0.335664	8	51.5613	45.95	7	56.776	49.4662	0.218848	12	51.8882	51.2282	9	43.9772	43.6253	0.136264	12	46.4194	42.5074	3	32.0843	29.7083
CD69+ CD8% CD8 T cells	FTY	UNTR	0.173646	16	27.1668	24.9698	12	18.9507	17.7276	0.151981	8	40.498	38.3152	7	28.4128	29.256	0.000660021	12	39.0815	40.4648	9	20.7908	17.3297	0.632967	12	33.7783	32.8782	3	27.3352	28.7823
CD25+ B% B cells	FTY	UNTR	0.222574	16	10.3318	8.2424	12	12.3404	12.1918	0.0205128	8	6.85832	6.86115	7	11.8197	10.8955	0.0183853	12	7.44969	5.9275	9	12.1116	14.0621	0.536264	12	6.55819	4.86195	3	8.7253	8.3782
CD25+ CD8% CD8 T cells	FTY	UNTR	0.24082	16	1.28309	1.012	12	1.97113	1.6263	0.866511	8	2.32581	1.91085	7	2.16093	1.456	0.111054	12	1.61184	1.17445	9	2.05066	1.8637	0.0043956	12	1.15733	0.84685	3	3.7339	3.8745
CD137+ CD8% CD8 T cells	FTY	UNTR	0.37129	16	1.65512	0.3335	12	1.86793	0.5523	0.694328	8	1.50046	0.9864	7	1.9523	1.0803	0.345103	12	0.746658	0.52995	9	1.16633	0.7445	0.0043956	12	0.394267	0.3478	3	3.94157	2.952
HLA-DR+ CD8% CD8 T cells	FTY	UNTR	0.599074	16	4.03014	3.05645	12	3.34711	2.7983	0.0938617	8	6.2319	5.8776	7	3.52346	3.0111	1	12	3.54404	2.9582	9	3.28144	2.9412	0.448352	12	6.16436	5.8015	3	4.2641	5.3317
CD25+ CD4% CD4 T cells	FTY	UNTR	0.664224	16	5.94454	6.04335	12	6.85722	7.2194	0.463403	8	7.53665	6.96885	7	5.80256	4.8646	1	12	5.08913	5.88155	9	4.97793	4.5877	0.232967	12	6.98538	7.8184	3	4.9957	5.1265
CD137+ CD4% CD4 T cells	FTY	UNTR	0.766584	16	0.646144	0.5915	12	0.625625	0.63715	0.955089	8	0.77225	0.6163	7	0.617543	0.7609	0.422107	12	0.450383	0.26465	9	0.484011	0.3856	0.101099	12	0.4737	0.2858	3	0.831067	0.7913

## Sheet: DMFvsUNTR_BvsB
Trait	Group1	Group2	T3.p_value_wilcoxon	T3.Sample_size1	T3.Mean_Group1	T3.Median_Group1	T3.Sample_size2	T3.Mean_Group2	T3.Median_Group2	T0.p_value_wilcoxon	T0.Sample_size1	T0.Mean_Group1	T0.Median_Group1	T0.Sample_size2	T0.Mean_Group2	T0.Median_Group2	T1.p_value_wilcoxon	T1.Sample_size1	T1.Mean_Group1	T1.Median_Group1	T1.Sample_size2	T1.Mean_Group2	T1.Median_Group2	T2.p_value_wilcoxon	T2.Sample_size1	T2.Mean_Group1	T2.Median_Group1	T2.Sample_size2	T2.Mean_Group2	T2.Median_Group2
CD69+ CD4% CD4 T cells	DMF	UNTR	0.000731429	22	26.3025	25.5987	12	11.6509	12.5376	0.311378	13	31.4924	25.4162	7	19.8258	22.0044	0.000977435	15	26.6101	24.3182	9	10.3804	8.9904	0.0703297	12	22.637	20.6835	3	10.5304	12.0976
CD69+ CD8% CD8 T cells	DMF	UNTR	0.00238625	22	40.0738	42.1962	12	18.9507	17.7276	0.210604	13	41.5678	39.0625	7	28.4128	29.256	0.00542408	15	41.3959	36.3588	9	20.7908	17.3297	0.83956	12	35.7216	31.5104	3	27.3352	28.7823
CD69+ B% B cells	DMF	UNTR	0.0305294	22	55.3263	51.3663	12	41.5934	39.5099	0.392879	13	51.9818	47.1729	7	56.776	49.4662	0.108457	15	55.1887	51.3716	9	43.9772	43.6253	0.0175824	12	49.0232	49.318	3	32.0843	29.7083
CD137+ B% B cells	DMF	UNTR	0.0741621	22	1.32222	1.21175	12	2.46826	1.9062	0.437797	13	1.9844	1.3138	7	1.88587	1.6297	1	15	2.07371	1.4027	9	1.53518	1.4482	0.364835	12	1.36763	0.78085	3	1.7647	1.5262
CD25+ CD8% CD8 T cells	DMF	UNTR	0.260516	22	3.2379	2.66835	12	1.97113	1.6263	0.392879	13	3.17129	3.0097	7	2.16093	1.456	0.289503	15	3.69855	3.002	9	2.05066	1.8637	0.448352	12	3.13404	2.63765	3	3.7339	3.8745
CD137+ CD8% CD8 T cells	DMF	UNTR	0.292389	22	2.80455	1.57025	12	1.86793	0.5523	0.642647	13	4.07133	1.1827	7	1.9523	1.0803	0.238355	15	2.89167	1.7241	9	1.16633	0.7445	0.294505	12	2.46573	1.6709	3	3.94157	2.952
HLA-DR+ CD4% CD4 T cells	DMF	UNTR	0.382709	22	1.1626	0.9462	12	1.5558	1.15515	0.274923	13	0.940685	0.8011	7	1.18196	1.0873	0.860912	15	1.31611	1.0081	9	1.16187	1.1142	0.632967	12	1.25762	1.1003	3	1.69003	1.2956
CD25+ CD4% CD4 T cells	DMF	UNTR	0.444063	22	6.62433	5.5675	12	6.85722	7.2194	0.182688	13	5.04732	3.546	7	5.80256	4.8646	0.173719	15	7.0616	7.6925	9	4.97793	4.5877	0.945055	12	5.45142	5.2211	3	4.9957	5.1265
CD25+ B% B cells	DMF	UNTR	0.487813	22	11.2484	8.84405	12	12.3404	12.1918	0.437797	13	12.1173	8.0813	7	11.8197	10.8955	0.860912	15	13.5698	9.656	9	12.1116	14.0621	0.83956	12	9.38702	8.2581	3	8.7253	8.3782
CD137+ CD4% CD4 T cells	DMF	UNTR	0.790011	22	0.690795	0.43855	12	0.625625	0.63715	0.642647	13	0.567408	0.2981	7	0.617543	0.7609	0.482002	15	0.73786	0.5203	9	0.484011	0.3856	0.136264	12	0.484883	0.45725	3	0.831067	0.7913
HLA-DR+ CD8% CD8 T cells	DMF	UNTR	0.845196	22	3.58062	2.8988	12	3.34711	2.7983	0.588029	13	2.8881	2.7079	7	3.52346	3.0111	1	15	3.75815	2.5561	9	3.28144	2.9412	0.83956	12	5.21653	3.7294	3	4.2641	5.3317
HLA-DR+ B% B cells	DMF	UNTR	0.92929	22	87.3717	88.9517	12	85.5557	90.8541	0.274923	13	91.6946	92.1026	7	94.0999	94.2817	0.725852	15	88.7993	91.2942	9	86.2831	87.6626	0.632967	12	89.6147	91.2738	3	88.1382	90.7703

## Sheet: NATvsUNTR_BvsB
Trait	Group1	Group2	T3.p_value_wilcoxon	T3.Sample_size1	T3.Mean_Group1	T3.Median_Group1	T3.Sample_size2	T3.Mean_Group2	T3.Median_Group2	T0.p_value_wilcoxon	T0.Sample_size1	T0.Mean_Group1	T0.Median_Group1	T0.Sample_size2	T0.Mean_Group2	T0.Median_Group2	T1.p_value_wilcoxon	T1.Sample_size1	T1.Mean_Group1	T1.Median_Group1	T1.Sample_size2	T1.Mean_Group2	T1.Median_Group2	T2.p_value_wilcoxon	T2.Sample_size1	T2.Mean_Group1	T2.Median_Group1	T2.Sample_size2	T2.Mean_Group2	T2.Median_Group2
CD25+ B% B cells	NAT	UNTR	4.7238e-05	20	27.335	26.9681	12	12.3404	12.1918	0.0108594	15	23.286	25.65	7	11.8197	10.8955	0.00180315	12	22.7287	22.6064	9	12.1116	14.0621	0.00150376	18	26.3565	25.8924	3	8.7253	8.3782
CD69+ B% B cells	NAT	UNTR	0.0396729	20	53.5535	50.5333	12	41.5934	39.5099	0.0465217	15	41.6051	42.3588	7	56.776	49.4662	0.345103	12	36.5123	33.4858	9	43.9772	43.6253	0.221053	18	39.978	39.9098	3	32.0843	29.7083
CD69+ CD8% CD8 T cells	NAT	UNTR	0.04824	20	14.5392	13.3366	12	18.9507	17.7276	0.00110235	15	14.027	8.7694	7	28.4128	29.256	0.0183853	12	13.265	8.91275	9	20.7908	17.3297	0.0105263	18	8.65433	5.57675	3	27.3352	28.7823
HLA-DR+ CD4% CD4 T cells	NAT	UNTR	0.0985433	20	1.70155	1.62385	12	1.5558	1.15515	0.730861	15	1.35082	1.3414	7	1.18196	1.0873	0.027823	12	1.66803	1.4072	9	1.16187	1.1142	0.73985	18	1.65641	1.52605	3	1.69003	1.2956
HLA-DR+ B% B cells	NAT	UNTR	0.115933	20	92.5667	93.6174	12	85.5557	90.8541	0.730861	15	94.3183	95.0039	7	94.0999	94.2817	0.218848	12	91.4337	91.4222	9	86.2831	87.6626	0.306767	18	91.8717	92.4771	3	88.1382	90.7703
CD25+ CD4% CD4 T cells	NAT	UNTR	0.271778	20	8.39029	7.34395	12	6.85722	7.2194	0.162363	15	8.34536	7.0918	7	5.80256	4.8646	0.0584833	12	8.13651	6.8883	9	4.97793	4.5877	0.184962	18	8.10444	6.53635	3	4.9957	5.1265
CD69+ CD4% CD4 T cells	NAT	UNTR	0.307265	20	14.6643	15.0433	12	11.6509	12.5376	0.077716	15	11.9881	10.271	7	19.8258	22.0044	0.972272	12	10.8775	8.7393	9	10.3804	8.9904	0.261654	18	7.14411	7.8585	3	10.5304	12.0976
CD137+ CD8% CD8 T cells	NAT	UNTR	0.307265	20	0.503405	0.3843	12	1.86793	0.5523	0.122948	15	0.590193	0.2618	7	1.9523	1.0803	0.0183853	12	0.389892	0.3012	9	1.16633	0.7445	0.00150376	18	0.373789	0.27715	3	3.94157	2.952
CD25+ CD8% CD8 T cells	NAT	UNTR	0.551805	20	2.15104	1.8466	12	1.97113	1.6263	0.945211	15	1.90056	1.6508	7	2.16093	1.456	0.218848	12	1.45881	1.2836	9	2.05066	1.8637	0.0796992	18	1.92617	1.4393	3	3.7339	3.8745
CD137+ B% B cells	NAT	UNTR	0.631526	20	2.01399	1.59595	12	2.46826	1.9062	0.237194	15	1.61461	1.0893	7	1.88587	1.6297	0.972272	12	1.70187	1.25135	9	1.53518	1.4482	0.813534	18	1.87821	1.6628	3	1.7647	1.5262
HLA-DR+ CD8% CD8 T cells	NAT	UNTR	0.659117	20	2.86313	2.56075	12	3.34711	2.7983	0.210069	15	2.44837	2.1647	7	3.52346	3.0111	0.553792	12	2.80541	2.7477	9	3.28144	2.9412	0.533835	18	3.37881	3.34225	3	4.2641	5.3317
CD137+ CD4% CD4 T cells	NAT	UNTR	0.833032	20	0.615125	0.47115	12	0.625625	0.63715	0.0319448	15	0.3501	0.3503	7	0.617543	0.7609	0.422107	12	0.413867	0.36255	9	0.484011	0.3856	0.0240602	18	0.415883	0.32735	3	0.831067	0.7913
